# Supplementary material for: Safety and efficacy of vinorelbine in combination with pertuzumab and trastuzumab for first-line treatment of patients with HER2-positive locally advanced or metastatic breast cancer: VELVET Cohort 1 final results
Source: Springer Nature journal article supplement (doi:10.1186/s13058-016-0773-6), 2016-12-01
Supplement: MOESM1 [file 11931268]

## Appendix

### VELVET study investigators

Brazil (S Costa, R Hegg, M Mano, J Nunes); Denmark (M Andersson, AH Jacobsen, S Linnet); France (S Delaloge, J Grenier, A-C Hardy Bessard, C Levy, J Medioni, C Moldovan, M Mousseau, T Petit, J-P Spano, B You, L Zelek); Germany (W Abenhardt, S Bauer, T Decker, B Flath, S Fuxius, R Hansen, E Ladda, L Mueller, S Roesel, C Salat, C Schulte, U Soeling, H Tesch, H-W Tessen, J Wamhoff, J Wiegand, M Zaiss); Italy (A Bottini, M Cazzaniga, L Del Mastro, A Falcone, S Gori, P Marchetti, F Roila, S Spazzapan, C Zamagni); Spain (N Batista Lopez, E Blanco Campanario, Y Fernandez Perez, I Garau Llinas, L Gonzalez Cortijo, JM Lopez Vega, R Perez Carrion, A Santaballa Bertran); USA (K Blackwell, H Burstein, V Hansen, RA Hirsch, R Livingston, C Ma, E Macrae, E Mrozek, RH Oyola, G Rodriguez, G Sledge, J Specht, E Tan-Chiu, C Vaughn, C Vogel).

### Ethical approval: List of independent ethics committees (IECs) or institutional review boards (IRBs)

| Country | Central Ethic Committee                                                                                                        |
|---------|--------------------------------------------------------------------------------------------------------------------------------|
| Denmark | The Ethics Committee in the Capital Region of Denmark.<br>Committee E                                                          |
| France  | Comité de Protection des Personnes Est IV<br>Hôpitaux Universitaire de Strasbourg<br>1, Place de l'Hôpital<br>67091 STRASBOURG |
| Germany | Ethik-Kommission der<br>Landesärztekammer Baden-Württemberg<br>Jahnstraße 40<br>70597 Stuttgart                                |
| Italy   | Comitato Etico Indipendente<br>A.O.U. Policlinico S. Orsola-Malpighi<br>Via Albertoni, 15<br>40138 Bologna                     |
| Italy   | Comitato Etico Area Vasta Nord Ovest<br>A.O.U. Pisana<br>Via Roma 67<br>56126 PISA PI                                          |
| Italy   | Comitato Etico delle Province di Cremona, Mantova e Lodi<br>V.le Concordia 1<br>26100 Cremona                                  |
| Italy   | Comitato Etico per le Sperimentazioni Cliniche delle Province<br>di Verona e Rovigo<br>Piazzale A. Stefani, 1<br>37126 VERONA  |

| Country | Central Ethic Committee                                                                                                                                                                                           |
|---------|-------------------------------------------------------------------------------------------------------------------------------------------------------------------------------------------------------------------|
| Italy   | Comitato Etico Regione Liguria - Sez. 2<br>c/o IRCCS A.O. Universitaria S. Martino – IST Istituto Nazionale per la Ricerca sul Cancro di Genova<br>Largo Rosanna Benzi, 10<br>16132 Genova                        |
| Italy   | Comitato Etico Indipendente<br>CRO IRCCS<br>Via Franco Gallini, 2<br>33081 Aviano                                                                                                                                 |
| Italy   | Comitato Etico delle Aziende Sanitarie dell'Umbria<br>Via della Rivoluzione, 16<br>06070 Ellera di Corciano                                                                                                       |
| Italy   | Comitato Etico della Provincia di Monza e Brianza<br>c/o Uff. Sperimentazioni Cliniche<br>A.O. San Gerardo -Villa Serena – III piano<br>Via Pergolesi, 33<br>20900 Monza                                          |
| Italy   | Comitato Etico dell'Università "Sapienza" (Policlinico Universitario Umberto I – A.O. S. Andrea)<br>Viale del Policlinico, 155<br>00161 Roma                                                                      |
| Spain   | HOSPITAL UNIVERSITARIO CENTRAL DE ASTURIAS<br>Comité Ético de Investigación Clínica. Centro de Rehabilitación - 5ª Planta<br>C/ CELESTINO VILLAMIL, S/N<br>33006- Oviedo                                          |
| Spain   | Comité de Ética de la Investigación de las Illes Balears<br>Consejería de Salud Dirección<br>C/ Jesús, 38A Palma de Mallorca 07010                                                                                |
| Spain   | CEIC del Hospital Universitario de Canarias<br>C/ Ofra, s/n<br>La Cuesta. La Laguna 38320                                                                                                                         |
| Spain   | Secretaría Técnica del CEIC de Cantabria<br>Fundación Marques de Valdecilla<br>Edificio IFIMAV, 3ª Planta<br>Avda. Cardenal Herrera Oria, s/n<br>39011 Santander                                                  |
| Spain   | CEIC Hospital Infanta Cristina Departamento de Farmacología de la Facultad de Medicina<br>Avda. de Elvas, s/n<br>Badajoz 0600                                                                                     |
| Spain   | CEIC del Hospital Puerta de Hierro Secretaria Tecnica del CEIC Planta 1ª - Pasillo Unidades Administrativas (peines 6-7)<br>C\ Joaquín Rodrigo, 2 (Entrada por Laboratorios-Banco de Sangre)<br>28222 Majadahonda |
| Spain   | CEIC Hospital Universitario La Fe<br>Torre A planta 7ª Bulevar Sur, s/n<br>46026 Valencia                                                                                                                         |

| <b>Country</b> | <b>Central Ethic Committee</b>                                                                    |
|----------------|---------------------------------------------------------------------------------------------------|
| USA            | Quorum Review IRB                                                                                 |
| USA            | Washington University in St. Louis Institutional Review Board                                     |
| USA            | Western IRB                                                                                       |
| USA            | Duke University Health System IRB for Clinical Investigations                                     |
| USA            | University of Miami Human Subject Research Office                                                 |
| USA            | Mary Washington Healthcare IRB                                                                    |
| USA            | Dana Farber Cancer Institute IRB                                                                  |
| USA            | Stanford University Administrative Panel on Human Subjects in Medical Research (multiple rosters) |
